# Supplementary material for: Direct synthesis of nanorod stacked “nest-like” hierarchical ZSM-48 hollow spheres using a triazine-based bolaform organic structure-directing agent
Source: Royal Society of Chemistry journal article supplement (doi:10.1039/d2qi00388k), 2022-01-01
Supplement: d2qi00388k1.pdf [file d2qi00388k1.pdf]

### Supporting information:

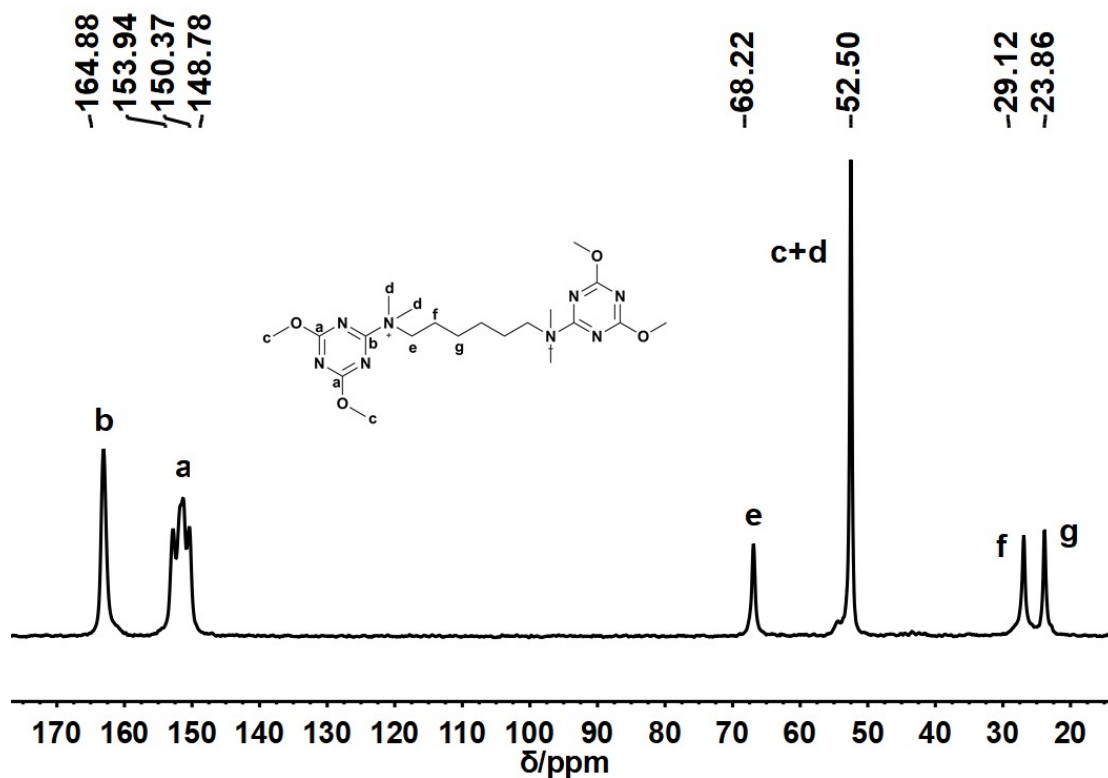

Fig. S1. The solid-state  $^{13}\text{C}$  CP/MAS NMR spectrum of the TBQA-1.

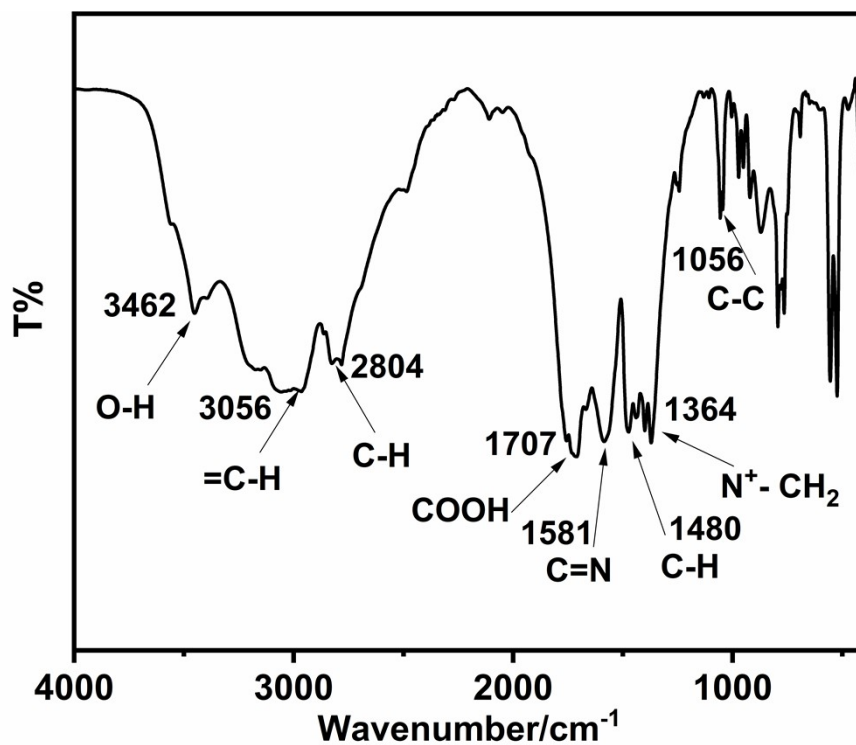

Fig. S2. The FT-IR spectrum of the TBQA-1. The absorption peak of  $-\text{COOH}$  in FT-IR spectrum was probably attributed to the hydrolysis of residual acetonitrile, which was serving as a solvent.

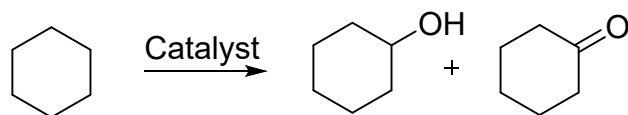

**Fig. S3.** Selective oxidation of cyclohexane. Similar reaction was performed with Pd loaded NSH-ZSM-48-300, SBA-15 and conventional Silicalite-1.

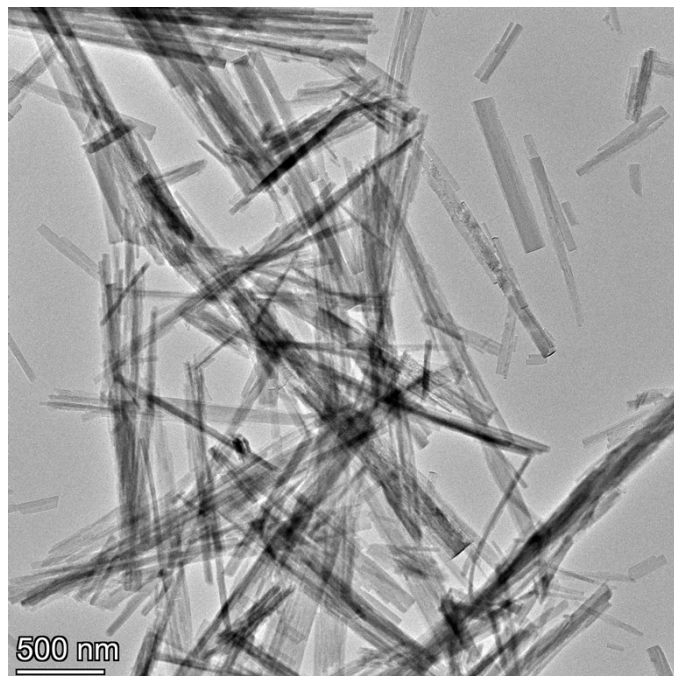

**Fig. S4.** The Low-magnification TEM images of NSH-ZSM-48-300.

|                                  | $S_{\text{BET}}^{\text{a/}}$ | $S_{\text{micro}}^{\text{b/}}$ | $S_{\text{meso}}^{\text{c/}}$ | $V_{\text{total}}^{\text{d/}}$ | $V_{\text{micro}}^{\text{b/}}$ | $V_{\text{meso}}^{\text{c/}}$ |
|----------------------------------|------------------------------|--------------------------------|-------------------------------|--------------------------------|--------------------------------|-------------------------------|
|                                  | $\text{m}^2/\text{g}$        | $\text{m}^2/\text{g}$          | $\text{m}^2/\text{g}$         | $\text{cm}^3/\text{g}$         | $\text{cm}^3/\text{g}$         | $\text{cm}^3/\text{g}$        |
| <b>Conventional SBA-15</b>       | 858                          | 117                            | 714                           | 1.292                          | 0.065                          | 1.227                         |
| <b>Conventional Silicalite-1</b> | 275                          | 220                            | 57                            | 0.185                          | 0.116                          | 0.069                         |

**Table S1.** Porosity of the calcined samples.

<sup>a</sup> calculated by applying the BET equation using the linear part ( $0.05 < P/P_0 < 0.30$ ) of the adsorption isotherm. <sup>b</sup> calculated by t-plot method. <sup>c</sup> calculated by BJH adsorption model. <sup>d</sup>  $V_{\text{total}} = V_{\text{micro}} + V_{\text{meso}}$ .
